# Supplementary material for: Analysis of the MammaPrint Breast Cancer Assay in a Predominantly Postmenopausal Cohort
Source: Oxford University Press journal article supplement (doi:10.1158/1078-0432.ccr-07-4723), 2008-05-15
Supplement: 10780432ccr074723-sup-supplementary_table_s1.xls [file 10780432ccr074723-sup-supplementary_table_s1.xls]

## Sheet: SupplementaryTable1
Age (years)	Size (cm)	Grade	ER	Surgery	Chemotherapy	Hormonal therapy	Radiotherapy	MammaPrint correlation value	MammaPrint verdict	Distant metastasis as a first event	Distant metastasis as a first event or censor days from Dx	Death	Death or censor days from Dx	Adjuvant! Online 10-year relapse risk	In Table 3B	In Table 3C and Figure 3B	Local recurrence or 2nd primary	Local recurrence or 2nd primary days from Dx
50	7.5	III	ER+	Mastectomy	yes	no	none	-0.434742	high risk	FALSE	5751	FALSE	5751	57.8	TRUE	TRUE	no	NA
43	2	III	ER-	Breast-conserving	yes	no	external beam	-0.355567	high risk	FALSE	3651	FALSE	3651	29.8	TRUE	TRUE	no	NA
70	4.5	III	ER+	Mastectomy	no	yes	none	0.290053	high risk	FALSE	1759	TRUE	1759	47.6	FALSE	FALSE	no	NA
49	2.2	II	ER+	Mastectomy	yes	no	none	0.444381	low risk	FALSE	5458	FALSE	5458	36.3	TRUE	TRUE	no	NA
76	1	II	ER+	Mastectomy	no	no	none	0.422509	low risk	FALSE	2446	TRUE	2446	14.3	TRUE	FALSE	no	NA
59	3.2	II	ER+	Breast-conserving	no	yes	external beam	0.395949	high risk	FALSE	5860	FALSE	5860	42.8	TRUE	TRUE	no	NA
49	3.7	I	ER+	Mastectomy	no	yes	external beam	0.461183	low risk	FALSE	5605	FALSE	5605	32.4	FALSE	FALSE	2nd primary	5605
38	1.5	III	ER-	Mastectomy	yes	no	none	-0.485971	high risk	FALSE	6486	FALSE	6486	29.8	TRUE	TRUE	no	NA
50	0.8	II	ER+	Breast-conserving	no	no	external beam	0.221636	high risk	FALSE	6747	FALSE	6747	17.6	TRUE	TRUE	no	NA
62	1	III	ER-	Mastectomy	no	no	none	-0.122813	high risk	FALSE	2734	FALSE	2734	21.1	TRUE	FALSE	no	NA
63	6	III	ER+	Mastectomy	no	no	none	0.09021	high risk	FALSE	6756	FALSE	6756	55.1	TRUE	TRUE	no	NA
68	0.8	II	ER+	Breast-conserving	no	no	external beam	0.0939	high risk	FALSE	4200	TRUE	4200	16.1	TRUE	TRUE	no	NA
60	2.5	III	ER+	Mastectomy	no	no	none	0.360747	high risk	FALSE	6568	TRUE	6568	42.6	TRUE	TRUE	no	NA
74	0.9	II	ER+	Breast-conserving	no	no	external beam	0.278056	high risk	FALSE	5561	FALSE	5561	14.9	TRUE	TRUE	no	NA
59	1.7	II	ER+	Breast-conserving	no	no	external beam	0.624059	low risk	FALSE	2794	FALSE	2794	23.7	TRUE	FALSE	no	NA
52	1.2	II	ER+	Mastectomy	no	no	none	0.467608	low risk	FALSE	2072	FALSE	2072	24.3	TRUE	FALSE	no	NA
52	1.5	III	ER-	Breast-conserving	no	no	none	-0.384643	high risk	FALSE	6488	FALSE	6488	29.5	FALSE	FALSE	2nd primary	6488
64	1.8	II	ER+	Mastectomy	no	no	none	0.490406	low risk	FALSE	584	FALSE	584	23.1	FALSE	FALSE	no	NA
56	2	II	ER+	Mastectomy	no	no	none	0.171196	high risk	FALSE	6480	FALSE	6480	24	TRUE	TRUE	no	NA
47	2.4	III	ER-	Breast-conserving	yes	yes	external beam	-0.38855	high risk	FALSE	6211	FALSE	6211	42.5	TRUE	TRUE	no	NA
57	1.6	II	ER+	Breast-conserving	no	yes	external beam	-0.284523	high risk	FALSE	1876	TRUE	1876	24	TRUE	FALSE	no	NA
60	0.9	III	ER+	Mastectomy	no	no	none	0.518962	low risk	FALSE	1063	TRUE	1063	19.9	FALSE	FALSE	no	NA
65	2.6	III	ER+	Breast-conserving	no	no	external beam	0.317851	high risk	FALSE	2887	FALSE	2887	41.4	TRUE	FALSE	no	NA
79	1.7	II	ER+	Mastectomy	no	no	none	0.320183	high risk	FALSE	4070	TRUE	4070	18.4	TRUE	TRUE	no	NA
81	1.8	II	ER+	Breast-conserving	no	yes	none	0.495224	low risk	FALSE	497	TRUE	497	17.1	FALSE	FALSE	no	NA
64	1.5	III	ER+	Mastectomy	no	no	none	0.450745	low risk	FALSE	2170	TRUE	2170	29.6	TRUE	FALSE	no	NA
42	1.2	II	ER-	Breast-conserving	yes	no	external beam	0.157452	high risk	FALSE	6332	FALSE	6332	26.8	TRUE	TRUE	no	NA
70	1.5	II	ER+	Breast-conserving	no	no	combination	0.360646	high risk	FALSE	3759	FALSE	3759	21.9	TRUE	TRUE	no	NA
65	1	III	ER+	Breast-conserving	no	yes	external beam	0.096509	high risk	FALSE	5206	FALSE	5206	19.3	TRUE	TRUE	no	NA
68	0.9	III	ER+	Breast-conserving	no	no	external beam	0.123313	high risk	FALSE	4688	FALSE	4688	18.8	TRUE	TRUE	no	NA
45	5.6	II	ER+	Mastectomy	no	no	none	0.048628	high risk	TRUE	3815	TRUE	4302	49.3	FALSE	FALSE	local recur	3815
70	1.2	II	ER+	Breast-conserving	no	yes	external beam	0.421171	low risk	FALSE	5978	FALSE	5978	21.9	TRUE	TRUE	no	NA
49	2	III	ER+	Breast-conserving	yes	no	combination	0.527078	low risk	FALSE	5932	FALSE	5932	31.4	TRUE	TRUE	no	NA
74	4	medullary carcinoma	ER-	Mastectomy	no	no	none	-0.276691	high risk	FALSE	3375	TRUE	3375	42.7	TRUE	FALSE	no	NA
70	2.5	II	ER+	Mastectomy	no	no	none	0.396174	high risk	FALSE	5424	FALSE	5424	32.5	TRUE	TRUE	no	NA
43	0.5	III	ER-	Mastectomy	yes	no	none	-0.417817	high risk	FALSE	5955	FALSE	5955	21.8	TRUE	TRUE	no	NA
69	1	III	ER+	Breast-conserving	no	yes	external beam	0.129401	high risk	FALSE	3555	TRUE	3555	18.6	TRUE	FALSE	no	NA
60	0.6	II	ER+	Mastectomy	no	no	none	0.512112	low risk	FALSE	5759	FALSE	5759	17	TRUE	TRUE	no	NA
47	1.2	I	ER+	Breast-conserving	no	yes	none	0.305765	high risk	FALSE	5615	FALSE	5615	17.8	TRUE	TRUE	no	NA
71	2.2	II	ER+	Mastectomy	no	no	none	0.085627	high risk	FALSE	5670	FALSE	5670	32.1	TRUE	TRUE	no	NA
60	1.2	III	ER+	Mastectomy	no	no	none	0.306225	high risk	FALSE	800	TRUE	800	30.3	FALSE	FALSE	no	NA
63	1.3	III	ER+	Breast-conserving	yes	yes	external beam	0.131006	high risk	FALSE	3703	FALSE	3703	29.8	TRUE	TRUE	no	NA
78	1.5	II	ER+	Breast-conserving	no	no	external beam	0.411936	low risk	FALSE	1327	TRUE	1327	19	FALSE	FALSE	no	NA
74	1.8	II	ER+	Mastectomy	no	no	none	0.562008	low risk	FALSE	4670	FALSE	4670	20.7	TRUE	TRUE	no	NA
64	1.8	II	ER+	Mastectomy	no	no	none	0.066636	high risk	FALSE	5632	FALSE	5632	23.1	TRUE	TRUE	no	NA
57	1.5	III	ER+	Breast-conserving	yes	no	external beam	0.314285	high risk	FALSE	2989	FALSE	2989	30.7	TRUE	FALSE	no	NA
58	1.4	II	ER-	Mastectomy	no	no	none	-0.337815	high risk	FALSE	1301	FALSE	1301	26.2	FALSE	FALSE	no	NA
74	2.5	II	ER+	Mastectomy	no	no	none	0.109663	high risk	FALSE	813	FALSE	813	30.7	FALSE	FALSE	no	NA
67	1.8	II	ER+	Mastectomy	no	yes	none	0.383558	high risk	FALSE	4605	FALSE	4605	22.6	TRUE	TRUE	no	NA
69	1.2	II	ER+	Breast-conserving	no	no	external beam	0.37072	high risk	FALSE	5822	FALSE	5822	22.2	TRUE	TRUE	no	NA
60	3.6	III	ER-	Mastectomy	no	no	none	-0.212913	high risk	FALSE	5124	FALSE	5124	45.3	TRUE	TRUE	no	NA
82	1.2	II	ER+	Mastectomy	no	no	none	0.298858	high risk	FALSE	4031	TRUE	4031	16.4	TRUE	TRUE	no	NA
47	2	II	ER+	Breast-conserving	yes	no	external beam	-0.173996	high risk	TRUE	1096	TRUE	1677	24.6	TRUE	TRUE	no	NA
78	1.9	II	ER+	Mastectomy	no	no	none	0.635485	low risk	FALSE	1916	FALSE	1916	19	TRUE	FALSE	no	NA
65	2.5	III	ER-	Mastectomy	no	no	none	0.064508	high risk	FALSE	1294	FALSE	1294	40.7	FALSE	FALSE	no	NA
65	1.5	II	ER+	Mastectomy	no	yes	none	0.432133	low risk	FALSE	5170	FALSE	5170	23	TRUE	TRUE	no	NA
65	1.6	II	ER+	Mastectomy	no	yes	none	0.349427	high risk	TRUE	209	TRUE	767	23	TRUE	TRUE	no	NA
48	3.1	III	ER+	Mastectomy	yes	no	none	-0.094818	high risk	FALSE	5091	FALSE	5091	53.1	TRUE	TRUE	no	NA
64	1.1	III	ER+	Breast-conserving	no	yes	external beam	0.180437	high risk	FALSE	5073	FALSE	5073	29.6	TRUE	TRUE	no	NA
48	1	II	ER+	Mastectomy	yes	no	none	0.328259	high risk	FALSE	4919	FALSE	4919	17.7	TRUE	TRUE	no	NA
62	1.5	II	ER+	Mastectomy	no	no	none	0.468152	low risk	FALSE	3878	FALSE	3878	23.4	TRUE	TRUE	no	NA
68	2	III	ER+	Breast-conserving	no	yes	external beam	0.547008	low risk	FALSE	3108	FALSE	3108	28.7	TRUE	FALSE	no	NA
56	0.5	III	ER+	Mastectomy	no	yes	none	-0.053679	high risk	FALSE	4704	FALSE	4704	20.2	TRUE	TRUE	no	NA
85	1.7	III	ER+	Mastectomy	no	no	none	0.460006	low risk	FALSE	1562	FALSE	1562	17.9	FALSE	FALSE	no	NA
64	1.5	II	ER+	Mastectomy	no	no	none	0.124201	high risk	FALSE	435	TRUE	435	23.1	FALSE	FALSE	no	NA
45	1.9	II	ER+	Breast-conserving	yes	no	none	0.413777	low risk	FALSE	4497	FALSE	4497	24.7	TRUE	TRUE	no	NA
70	1.5	III	ER+	Mastectomy	no	no	none	-0.079718	high risk	FALSE	4412	FALSE	4412	28.1	TRUE	TRUE	no	NA
36	3.5	III	ER-	Mastectomy	yes	no	external beam	-0.398682	high risk	TRUE	482	TRUE	645	46.8	TRUE	TRUE	no	NA
57	1	I	ER+	Breast-conserving	no	yes	external beam	0.66465	low risk	FALSE	4047	FALSE	4047	14.4	TRUE	TRUE	no	NA
53	1.5	III	ER-	Breast-conserving	yes	no	external beam	-0.114999	high risk	FALSE	4782	FALSE	4782	29.4	TRUE	TRUE	no	NA
56	0.9	I	ER+	Breast-conserving	no	no	none	0.544401	low risk	FALSE	4734	FALSE	4734	14.4	TRUE	TRUE	no	NA
68	2.1	III	ER+	Mastectomy	no	yes	none	0.380987	high risk	FALSE	4627	FALSE	4627	40.4	TRUE	TRUE	no	NA
69	1.6	III	ER-	Breast-conserving	no	no	external beam	0.175117	high risk	FALSE	4484	FALSE	4484	27.7	TRUE	TRUE	no	NA
45	2	III	ER-	Breast-conserving	yes	no	external beam	-0.320754	high risk	FALSE	4616	FALSE	4616	29.7	TRUE	TRUE	no	NA
49	1.5	III	ER+	Breast-conserving	yes	no	external beam	0.106271	high risk	TRUE	1044	TRUE	1780	31.4	TRUE	TRUE	no	NA
46	1	II	ER+	Mastectomy	no	no	none	0.477515	low risk	FALSE	4549	FALSE	4549	17.7	TRUE	TRUE	no	NA
72	2.5	II	ER+	Mastectomy	no	no	none	0.29792	high risk	FALSE	4325	TRUE	4325	31.7	TRUE	TRUE	no	NA
74	1	II	ER+	Breast-conserving	no	no	external beam	0.590486	low risk	FALSE	841	FALSE	3451	14.9	FALSE	FALSE	local recur	841
88	1.2	II	ER+	Mastectomy	no	no	none	0.350873	high risk	FALSE	1879	FALSE	1879	11.1	TRUE	FALSE	no	NA
31	2.3	III	ER-	Breast-conserving	yes	no	external beam	-0.174738	high risk	FALSE	3725	FALSE	3725	42.9	TRUE	TRUE	no	NA
61	1.5	II	ER+	Mastectomy	no	no	none	0.040294	high risk	FALSE	1945	TRUE	1945	23.5	TRUE	FALSE	no	NA
44	3.3	II	ER+	Mastectomy	no	no	none	0.535837	low risk	FALSE	1452	FALSE	1452	44.4	FALSE	FALSE	no	NA
66	2.4	II	ER+	Breast-conserving	no	no	external beam	0.075834	high risk	FALSE	4461	FALSE	4461	33.8	TRUE	TRUE	no	NA
79	3.5	II	ER+	Breast-conserving	no	no	none	0.108722	high risk	FALSE	1126	FALSE	1126	33.4	FALSE	FALSE	no	NA
80	1.7	III	ER+	Mastectomy	no	no	none	0.196792	high risk	FALSE	538	TRUE	538	22.9	FALSE	FALSE	no	NA
55	1.5	III	ER-	Breast-conserving	yes	no	external beam	-0.406603	high risk	FALSE	4557	FALSE	4557	29.3	TRUE	TRUE	no	NA
43	1	III	ER-	Breast-conserving	no	no	external beam	-0.071941	high risk	FALSE	4578	FALSE	4578	21.8	TRUE	TRUE	no	NA
81	2.8	II	ER+	Mastectomy	no	yes	none	0.364533	high risk	FALSE	1630	TRUE	1630	25.5	FALSE	FALSE	no	NA
54	1.2	II	ER+	Breast-conserving	no	no	none	0.515052	low risk	FALSE	1711	FALSE	1711	24.2	FALSE	FALSE	no	NA
43	0.5	III	ER-	Mastectomy	no	no	none	0.073152	high risk	FALSE	2872	FALSE	2872	21.8	TRUE	FALSE	no	NA
70	3.5	II	ER+	Breast-conserving	no	yes	external beam	0.051086	high risk	TRUE	0	TRUE	2641	39.6	TRUE	TRUE	both	0
73	1.2	II	ER+	Breast-conserving	no	yes	external beam	-0.063934	high risk	FALSE	6575	FALSE	6575	21.1	TRUE	TRUE	no	NA
50	0.8	II	ER+	Breast-conserving	no	no	external beam	0.096333	high risk	TRUE	4256	TRUE	4752	17.6	FALSE	FALSE	no	NA
72	1	I	ER+	Mastectomy	no	yes	none	0.364179	high risk	FALSE	5973	FALSE	5973	12.8	TRUE	TRUE	no	NA
69	6	II	ER+	Mastectomy	no	no	none	0.223084	high risk	TRUE	730	TRUE	4518	44.5	TRUE	TRUE	no	NA
62	9.4	III	ER-	Mastectomy	no	no	none	-0.445785	high risk	TRUE	608	TRUE	602	48.9	TRUE	TRUE	no	NA
66	1.6	II	ER+	Breast-conserving	no	yes	external beam	0.378594	high risk	FALSE	764	FALSE	764	22.8	FALSE	FALSE	no	NA
37	1.8	II	ER+	Mastectomy	no	no	none	0.274608	high risk	FALSE	3369	FALSE	3369	24.8	TRUE	FALSE	no	NA
77	0.8	II	ER+	Mastectomy	no	no	none	-0.589932	high risk	FALSE	2042	FALSE	2042	14	TRUE	FALSE	no	NA
48	1.7	II	ER+	Mastectomy	yes	no	none	0.590203	low risk	FALSE	2560	FALSE	2560	24.6	TRUE	FALSE	no	NA
